# Supplementary material for: Theoretical investigation of the singlet–triplet splittings for carbazole-based thermally activated delayed fluorescence emitters
Source: Royal Society of Chemistry journal article supplement (doi:10.1039/c6cp04545f), 2016-01-01
Supplement: c6cp04545f1.pdf [file c6cp04545f1.pdf]

## Supporting Information

### Theoretical Investigation of the Singlet–Triplet Splittings for Carbazole-Based Thermally Activated Delayed Fluorescence Emitter

*Ke Liang,<sup>a</sup> Caijun Zheng,<sup>\*b,c</sup> Kai Wang,<sup>a,c</sup> Wei Liu,<sup>a,c</sup> Zhenyu Guo,<sup>a</sup> Youyong Li,<sup>\*a</sup>*

*Xiaohong Zhang.<sup>\*a</sup>*

*<sup>a</sup>Institute of Functional Nano & Soft Materials (FUNSOM), Jiangsu Key Laboratory  
for Carbon-Based Functional Materials & Devices, Soochow University, Suzhou,  
Jiangsu, 215123, P.R. China,*

*E-mail: xiaohong\_zhang@suda.edu.cn, yyli@suda.edu.cn*

*<sup>b</sup>School of Optoelectronic Information, University of Electronic Science and  
Technology of China (UESTC) Chengdu, 610054, P.R. China,*

*E-mail: zhengcaijun@uestc.edu.cn*

*<sup>c</sup>Nano-organic Photoelectronic Laboratory and Key Laboratory of Photochemical  
Conversion and Optoelectronic Materials, Technical Institute of Physics and  
Chemistry, Chinese Academy of Sciences, Beijing 100190, P.R. China.*

## Contents

**Table S1.** Calculated  $E_{VA}(S_1)$  and  $E_{VA}(T_1)$  using various XC functionals.

**Figure S1.** Dependence of  $E_{VA}(S_1)$  and  $E_{VA}(T_1)$  of the compounds investigated on the HF% in TD-DFT functionals.

**Table S2.** CI description of  $S_1$  transition by B3LYP/6-31G\* and the amount of charge transfer.

**Table S3.** Calculated  $E_{00}(^3LE)$  of the Cz-based compounds using OHF.

**Table S4.** Calculated  $E_{00}(S_1)$  and  $E_{00}(T_1)$  using various XC functionals based on the optimized excited states.

**Table S5.** Calculated relaxation energies ( $\lambda$ ) using various XC functionals.

**Figure S2.** HOMO and LUMO of the  $S_1$  state calculated at the B3LYP/6-31G\* level.

**Figure S3.** Hole-particle pairs of natural transition orbitals (NTO) of the  $T_1$  state.

## OHF method

OHF is determined by the relation  $OHF=42q$ .  $q$  is the CT amount which simplified in equation (1) below.  $\sum_i a_i=1$ ,  $\sum_i b_i=1$ , and  $q = q_+ = q_-$ , where the index  $i$  represents the number of fragments;  $a_i$  and  $b_i$  are the contribution percentages of different molecular fragments in HOMO and LUMO, respectively.  $E_{00}(S_1)$  is expressed by equation (2), in which 0.24 eV consists of two parts: Stokes-shift energy loss (0.09 eV) and vibrational energy level difference between the vertical transition (0.15 eV). In equation (3),  $C = E_{VA}(S_1,OHF)/E_{VA}(S_1,B3LYP)$  where  $E_{VA}(S_1,OHF)$  is the singlet vertical excitation energy from the  $E_{VA}$  and HF% curves according to  $OHF=42q$ , and  $E_{VA}(S_1,B3LYP)$  is the singlet vertical excitation energy calculated by B3LYP functional. In equation (4), 0.09 eV is the Stokes-shift energy loss and  $E_{00}(^3LE)$  is the average value calculated by BMK, M06-2X and M06-HF where  $C$  is 1.10, 1.18 and 1.30, respectively.

$$q_+ = e \sum_i |a_i - b_i|, a_i - b_i > 0; q_- = e \sum_i |a_i - b_i|, a_i - b_i < 0 \quad (1)$$

$$E_{00}(S_1) = E_{VA}(S_1,OHF) - 0.24 \quad (2)$$

$$E_{00}(^3CT) = E_{00}(S_1) - E_{VA}(S_1,OHF) + C \times E_{VA}(T_1,B3LYP), \quad (3)$$

$$E_{00}(^3LE) = E_{VA}(T_1)/C - 0.09 \quad (4)$$

**Table S1.** Calculated  $E_{VA}(S_1)$  and  $E_{VA}(T_1)$  using various XC functionals based on B3LYP optimized  $S_0$  geometry (unit of all the data is eV).

| Functional      | TTO           |               | AQ1           |               | AQ2           |               | DMD           |               | MID           |               |
|-----------------|---------------|---------------|---------------|---------------|---------------|---------------|---------------|---------------|---------------|---------------|
|                 | $E_{VA}(S_1)$ | $E_{VA}(T_1)$ |
| <b>BLYP</b>     | 2.327         | 2.181         | 1.568         | 1.414         | 1.558         | 1.377         | 2.226         | 2.042         | 2.145         | 1.958         |
| <b>MPWLYP1M</b> | 2.506         | 2.334         | 1.735         | 1.574         | 1.713         | 1.524         | 2.402         | 2.197         | 2.314         | 2.111         |
| <b>B3LYP*</b>   | 2.861         | 2.620         | 2.083         | 1.891         | 2.040         | 1.824         | 2.762         | 2.490         | 2.658         | 2.402         |
| <b>B3LYP</b>    | 3.037         | 2.740         | 2.266         | 2.045         | 2.214         | 1.971         | 2.943         | 2.611         | 2.834         | 2.529         |
| <b>PBE0</b>     | 3.216         | 2.811         | 2.451         | 2.169         | 2.388         | 2.092         | 3.122         | 2.672         | 3.018         | 2.613         |
| <b>MPW1B95</b>  | 3.353         | 2.972         | 2.620         | 2.334         | 2.549         | 2.255         | 3.236         | 2.805         | 3.165         | 2.783         |
| <b>BMK</b>      | 3.650         | 3.176         | 2.952         | 2.582         | 2.868         | 2.506         | 3.353         | 2.893         | 3.466         | 2.992         |
| <b>M06-2X</b>   | 3.860         | 3.374         | 3.146         | 2.763         | 3.112         | 2.731         | 3.3287        | 2.941         | 3.727         | 3.225         |
| <b>M06HF</b>    | 4.404         | 3.785         | 2.805         | 2.492         | 2.808         | 2.495         | 2.883         | 2.568         | 3.816         | 3.492         |

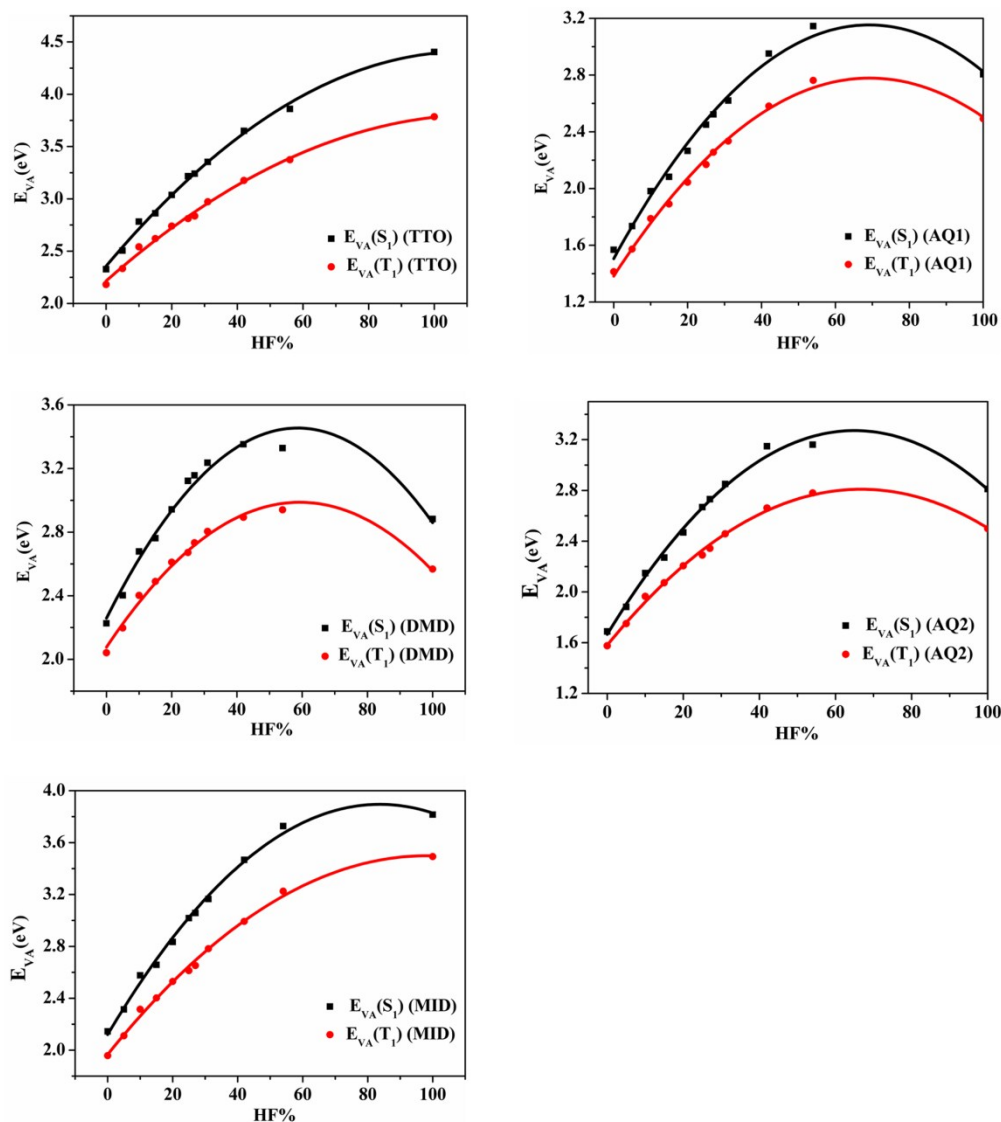

**Figure S1.** Dependence of  $E_{VA}(S_1)$  and  $E_{VA}(T_1)$  of the compounds investigated on the HF% in TD-DFT functionals.

**Table S2.** CI description of  $S_1$  transition by B3LYP/6-31G\* level and the amount of charge transfer.

| Compound | CI coefficient | CI description of $S_1$ | $C_j$ % <sup>a</sup> | CT amount (q) |
|----------|----------------|-------------------------|----------------------|---------------|
| TTO      | 0.70106        | HOMO→LUMO               | 98.3%                | 0.8609        |
| AQ1      | 0.70404        | HOMO→LUMO               | 99.1%                | 0.8614        |
| AQ2      | 0.70383        | HOMO→LUMO               | 99.1%                | 0.8283        |
| DMD      | 0.68883        | HOMO→LUMO               | 94.9%                | 0.8548        |
| MID      | 0.70384        | HOMO→LUMO               | 99.1%                | 0.8518        |

$${}^a C_j \% = (\text{CI coefficient})^2 \times 2 \times 100\%.$$

**Table S3.** Calculated  $E_{00}(^3LE)$  of the Cz-based compounds using OHF (unit of all the energy data is eV).

| Compound | OHF% | $E_{VA}(S_1, OHF)$ | $E_{00}(^3LE)$ |        |        |         |
|----------|------|--------------------|----------------|--------|--------|---------|
|          |      |                    | BMK            | M06-2X | M06-HF | Average |
| TTO      | 36   | 3.49               | 2.797          | 2.769  | 2.821  | 2.796   |
| AQ1      | 36   | 2.78               | 2.347          | 2.251  | 1.827  | 2.142   |
| AQ2      | 35   | 2.68               | 2.188          | 2.225  | 1.829  | 2.081   |
| DMD      | 36   | 2.85               | 2.540          | 2.312  | 1.885  | 2.246   |
| MID      | 36   | 3.32               | 2.630          | 2.643  | 2.596  | 2.623   |

**Table S4.** Calculated  $E_{00}(S_1)$  and  $E_{00}(T_1)$  and relaxation energies using various XC functionals based on the optimized excited states (unit of all the data is eV).

| Functional   |               | TTO   | AQ1   | AQ2   | DMD   | MID   |
|--------------|---------------|-------|-------|-------|-------|-------|
| BLYP         | $E_{00}(S_1)$ | 1.734 | 0.977 | 0.957 | 1.572 | 1.493 |
|              | $E_{00}(T_1)$ | 1.730 | 0.974 | 0.952 | 1.565 | 1.487 |
| MPWLYP1<br>M | $E_{00}(S_1)$ | 1.953 | 1.203 | 1.180 | 1.800 | 1.717 |
|              | $E_{00}(T_1)$ | 1.948 | 1.199 | 1.174 | 1.792 | 1.710 |
| B3LYP*       | $E_{00}(S_1)$ | 2.34  | 1.64  | 1.60  | 2.24  | 2.15  |
|              | $E_{00}(T_1)$ | 2.33  | 1.635 | 1.59  | 2.23  | 2.14  |
| B3LYP        | $E_{00}(S_1)$ | 2.53  | 1.86  | 1.81  | 2.45  | 2.36  |
|              | $E_{00}(T_1)$ | 2.51  | 1.84  | 1.80  | 2.40  | 2.30  |
| PBE0         | $E_{00}(S_1)$ | 2.73  | 2.10  | 2.04  | 2.70  | 2.60  |
|              | $E_{00}(T_1)$ | 2.57  | 1.99  | 1.95  | 2.47  | 2.37  |
| MPW1B95      | $E_{00}(S_1)$ | 2.91  | 2.24  | 2.30  | 2.93  | 2.83  |
|              | $E_{00}(T_1)$ | 2.74  | 2.06  | 2.12  | 2.55  | 2.55  |
| BMK          | $E_{00}(S_1)$ | 3.26  | 2.66  | 2.68  | 3.09  | 3.18  |
|              | $E_{00}(T_1)$ | 2.86  | 2.27  | 2.32  | 2.69  | 2.67  |
| CAM-B3LYP    | $E_{00}(S_1)$ | 3.607 | 3.134 | 3.085 | 3.244 | 3.558 |
|              | $E_{00}(T_1)$ | 2.736 | 2.252 | 2.239 | 2.578 | 2.515 |
| wB97X-D      | $E_{00}(S_1)$ | 3.782 | 3.224 | 3.23  | 3.213 | 3.659 |
|              | $E_{00}(T_1)$ | 2.896 | 2.386 | 2.359 | 2.795 | 2.636 |
| Experimental | $E_{00}(S_1)$ | 2.54  | 2.15  | 2.11  | 2.53  | 2.45  |
|              | $E_{00}(T_1)$ | 2.51  | 2.13  | 2.10  | 2.50  | 2.41  |

**Table S5.** Calculated relaxation energies ( $\lambda$ ) using various XC functionals (unit of all the data is eV).

| <b>Functional</b> |             | <b>TTO</b> | <b>AQ1</b> | <b>AQ2</b> | <b>DMD</b> | <b>MID</b> |
|-------------------|-------------|------------|------------|------------|------------|------------|
| <b>B3LYP*</b>     | $\lambda_S$ | 0.52       | 0.44       | 0.44       | 0.52       | 0.51       |
|                   | $\lambda_T$ | 0.29       | 0.26       | 0.23       | 0.26       | 0.26       |
| <b>B3LYP</b>      | $\lambda_S$ | 0.51       | 0.41       | 0.40       | 0.49       | 0.47       |
|                   | $\lambda_T$ | 0.23       | 0.20       | 0.17       | 0.21       | 0.23       |
| <b>PBE0</b>       | $\lambda_S$ | 0.49       | 0.35       | 0.35       | 0.42       | 0.42       |
|                   | $\lambda_T$ | 0.24       | 0.18       | 0.142      | 0.20       | 0.24       |
| <b>MPW1B95</b>    | $\lambda_S$ | 0.44       | 0.38       | 0.25       | 0.31       | 0.34       |
|                   | $\lambda_T$ | 0.23       | 0.27       | 0.14       | 0.26       | 0.23       |
| <b>BMK</b>        | $\lambda_S$ | 0.39       | 0.29       | 0.19       | 0.26       | 0.29       |
|                   | $\lambda_T$ | 0.32       | 0.31       | 0.19       | 0.20       | 0.32       |

|     | HOMO                                                                                | LUMO                                                                                 |
|-----|-------------------------------------------------------------------------------------|--------------------------------------------------------------------------------------|
| TTO | 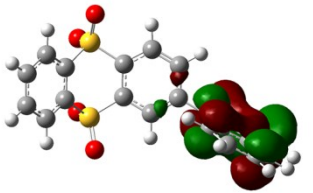   |    |
| AQ1 |    |    |
| AQ2 |    |    |
| DMD |  |  |
| MID |  |  |

**Figure S2.** HOMO and LUMO of the  $S_1$  state calculated at the B3LYP/6-31G\* level.



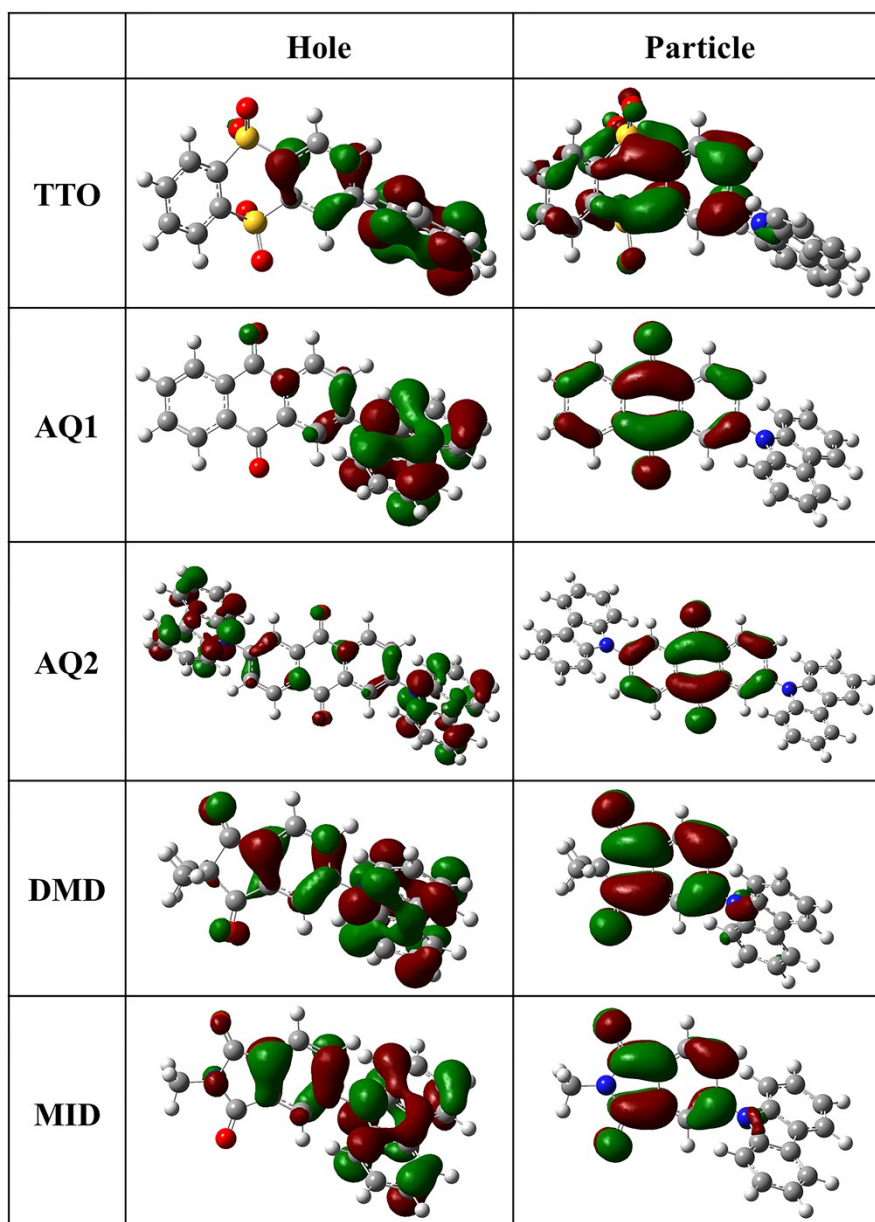

**Figure S3.** Hole-particle pairs of natural transition orbitals (NTO) of the optimized  $T_1$  state for the Cz-based molecules.
